# Supplementary material
Source: PubMed Central journal article supplement (PMC1817620)

No treatment before fixation (no extraction)

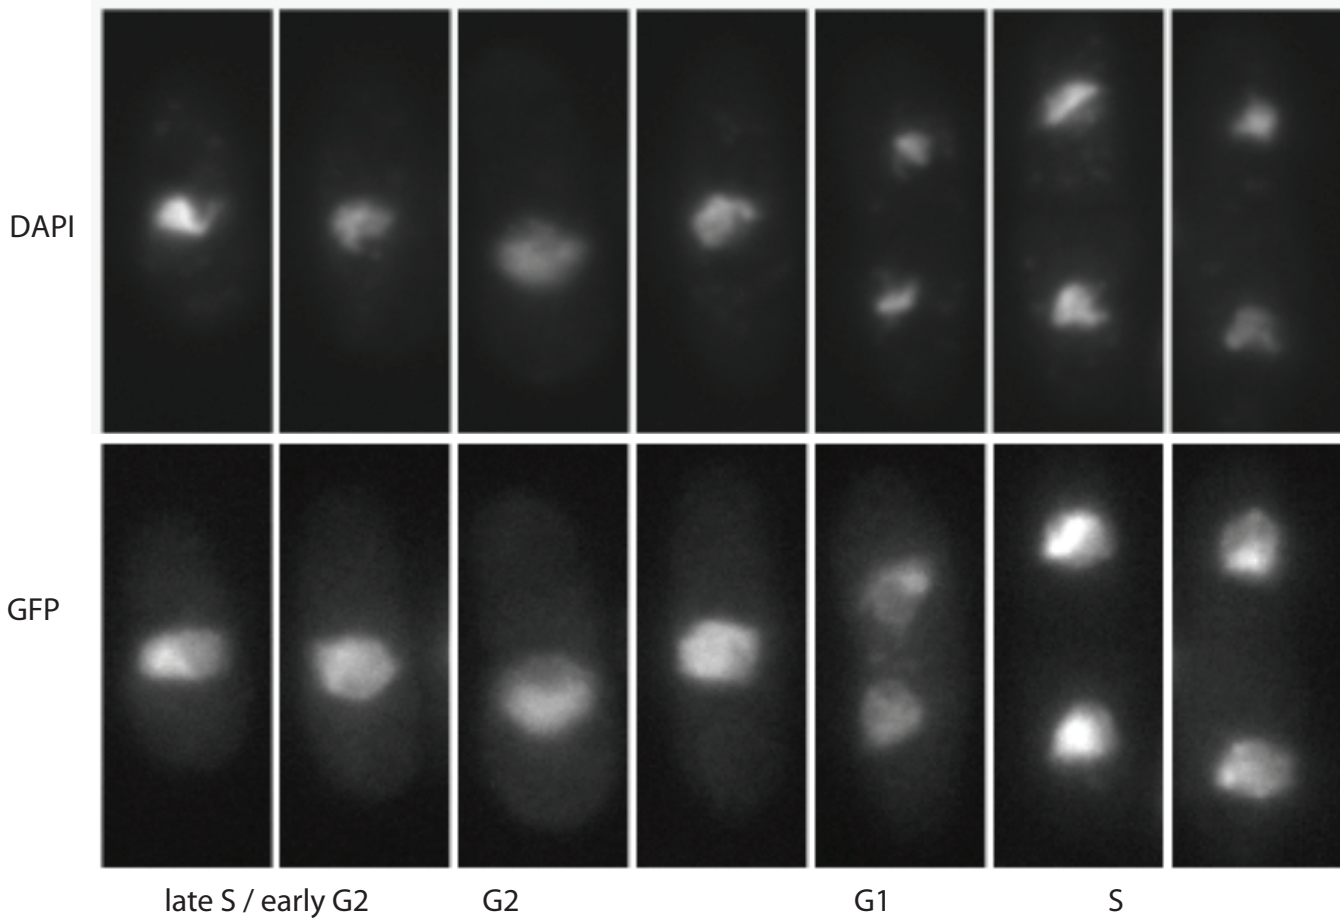

With Triton X100 extraction before fixation

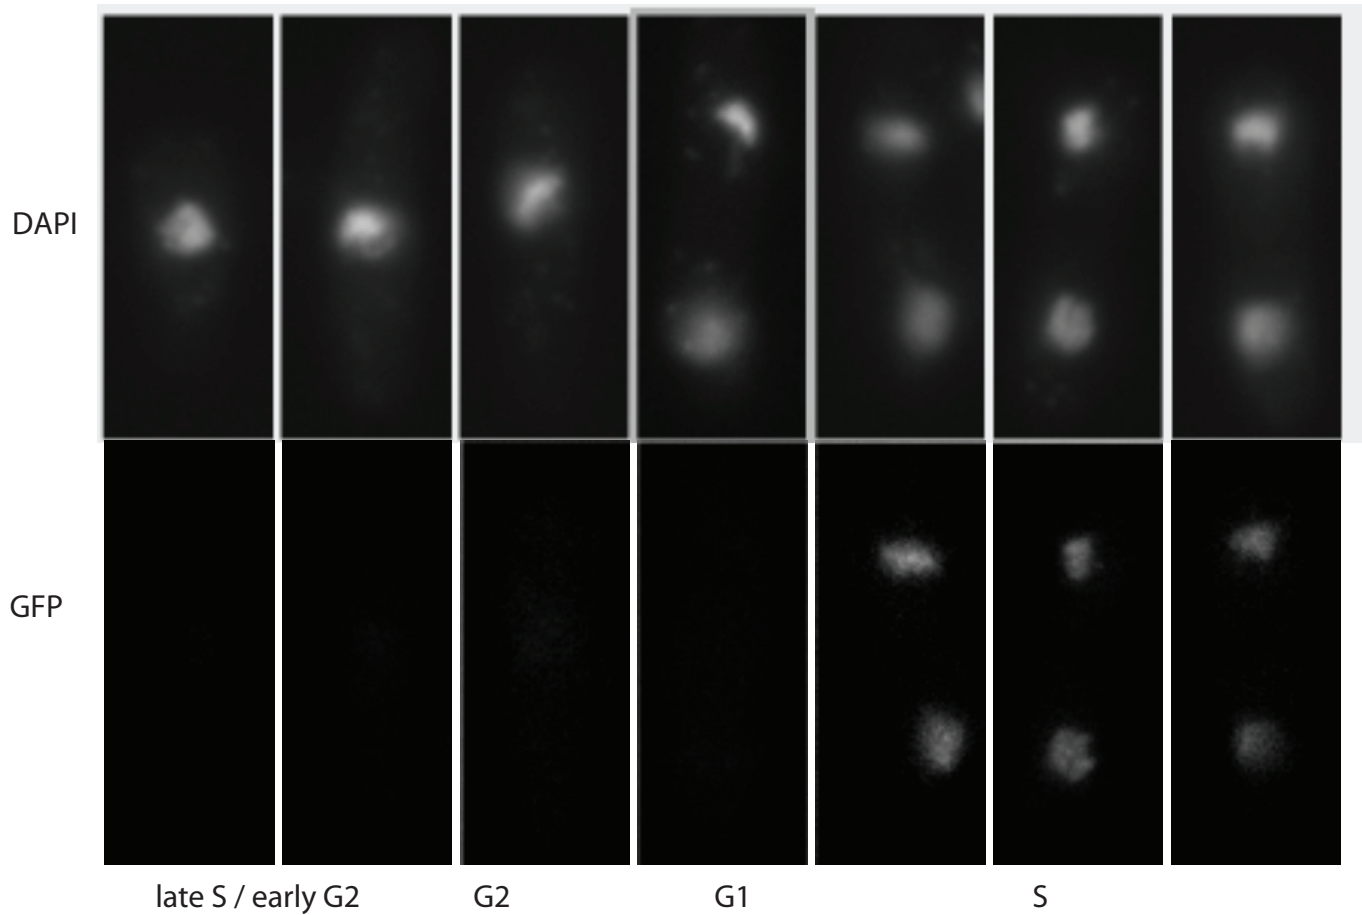

Supplement: 7601538s2.pdf [file 7601538s2.pdf]

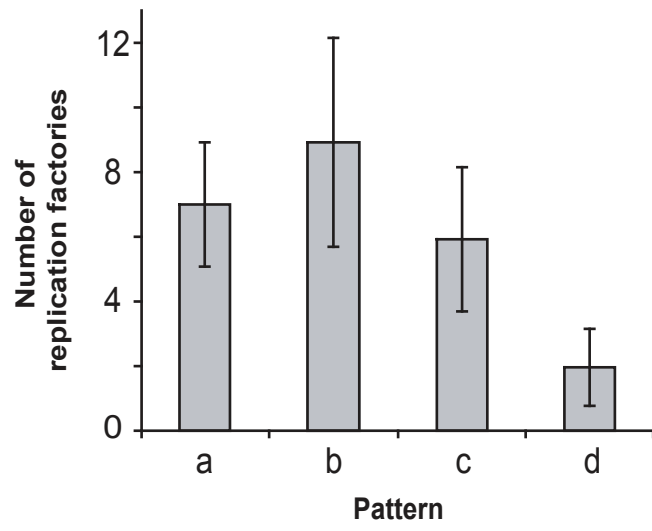

**Meister et al. Supplementary Figure 2**

Supplement: 7601538s3.pdf [file 7601538s3.pdf]

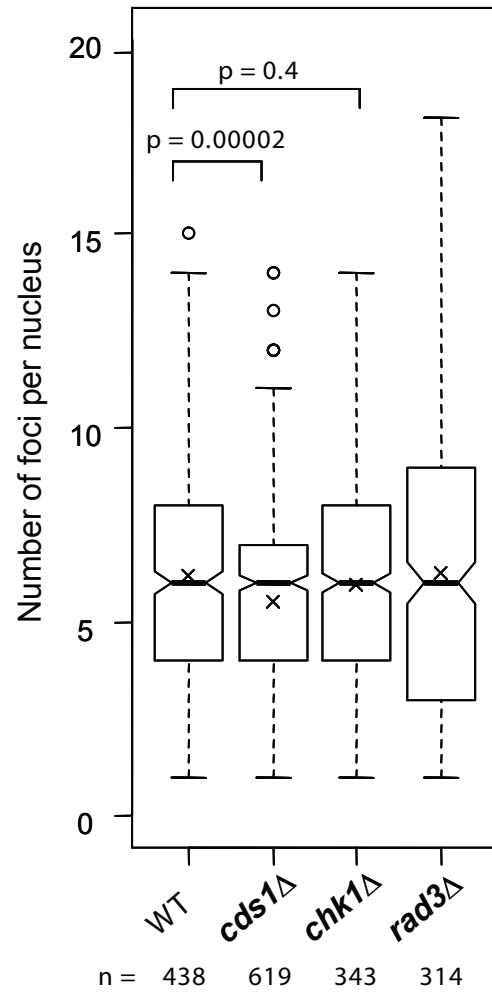

Meister et al., Supplemental Figure 3

Supplement: 7601538s4.pdf [file 7601538s4.pdf]

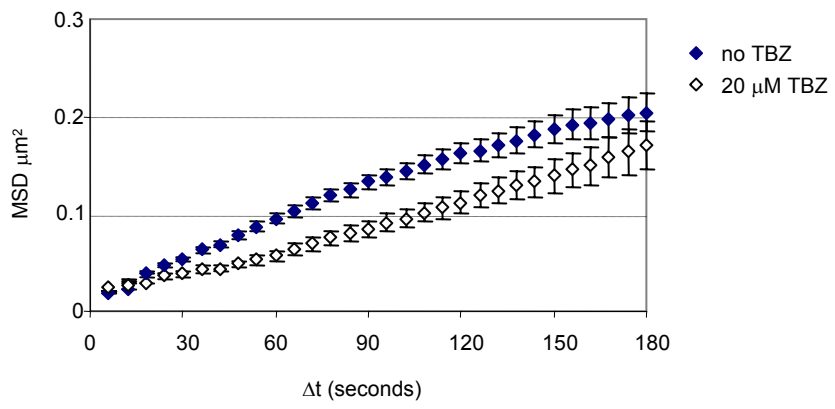

**Meister et al., Supplementary Figure 4**

Supplement: 7601538s5.pdf [file 7601538s5.pdf]
